# Supplementary material
Source: publisher site journal article supplement (https://www.dovepress.com/article/574707)
Supplement: Supplementary file 1 [file 574707%20Supplementary%20Table%20S1.docx]

**Supplementary Table S1. Summary of Analytical Parameters and Thresholds.**

*This table consolidates all key analytical parameters, threshold values, and software versions used in the bioinformatic and statistical analyses of this study.*

| **Parameter** | **Value / Criteria** | **Software / Source** |
| --- | --- | --- |
| **Data Processing** | | |
| Normalization | RMA algorithm | limma v3.56.2, affy v1.78.0 |
| Batch correction | ComBat (parametric, empirical Bayes) | sva v3.48.0 |
| Quality exclusion | Median NUSE > 1.05 or RLE > 0.1 | arrayQualityMetrics |
| Low-expression filter | Mean expression < 5th percentile | — |
| **DEG Analysis** | | |
| Adjusted p-value cutoff | < 0.05 (Benjamini-Hochberg) | limma |
| |log2(fold change)| | > 1 | limma |
| Multiple testing | Moderated t-statistics, empirical Bayes | limma |
| **WGCNA Parameters** | | |
| Soft-thresholding power (β) | 9 (R² > 0.85) | WGCNA v1.72.1 |
| Minimum module size | 30 genes | — |
| Module merging threshold | 0.25 (dissimilarity) | — |
| Outlier removal | Height > mean + 3×SD | — |
| Module significance | r > 0.6, p < 0.05 | — |
| Preservation permutations | 200 | — |
| **TF Analysis** | | |
| ChEA3 method | MeanRank integration | ENCODE, ReMap, literature |
| TF selection criteria | p < 0.01, adjusted p < 0.01, ≥3 targets | — |
| **Enrichment Analysis** | | |
| GO/KEGG/Reactome cutoffs | p < 0.01, adjusted p < 0.01, gene count ≥3 | clusterProfiler v4.8.1 |
| GSEA permutations | 1000 | — |
| **CIBERSORT** | | |
| Signature matrix | LM22 (22 cell types, 547 genes) | CIBERSORTx |
| Permutations | 1000 | — |
| Sample exclusion | Deconvolution p > 0.05 | — |
| **PPI Network** | | |
| STRING confidence | 0.4 (medium) | STRING v12.0 |
| MCODE parameters | Degree cutoff=2, node score=0.2, k-core=2, max depth=100 | MCODE v2.0.2 |
| Hub gene criteria | MCODE>6, degree>30, betweenness>100, closeness>0.005 | CentiScaPe v2.2 |
| **Correlation Analysis** | | |
| Hub-immune correlation | |r| > 0.5, adjusted p < 0.05 (Bonferroni) | corrplot v0.92 |

Abbreviations: DEG, differentially expressed gene; WGCNA, weighted gene co-expression network analysis; TF, transcription factor; GO, Gene Ontology; KEGG, Kyoto Encyclopedia of Genes and Genomes; GSEA, gene set enrichment analysis; PPI, protein-protein interaction; MCODE, Molecular Complex Detection; RMA, Robust Multiarray Average; NUSE, Normalized Unscaled Standard Errors; RLE, Relative Log Expression.
